# Supplementary material for: Establishing and evaluation of a polymerase chain reaction for the detection of Echinococcus multilocularis in human tissue
Source: PubMed Central journal article supplement (PMC7906421; doi:10.1371/journal.pntd.0009155), 2021-02-25
Supplement: pntd.0009155.s005.pdf [file pntd.0009155.s005.pdf]

**Figure S5**

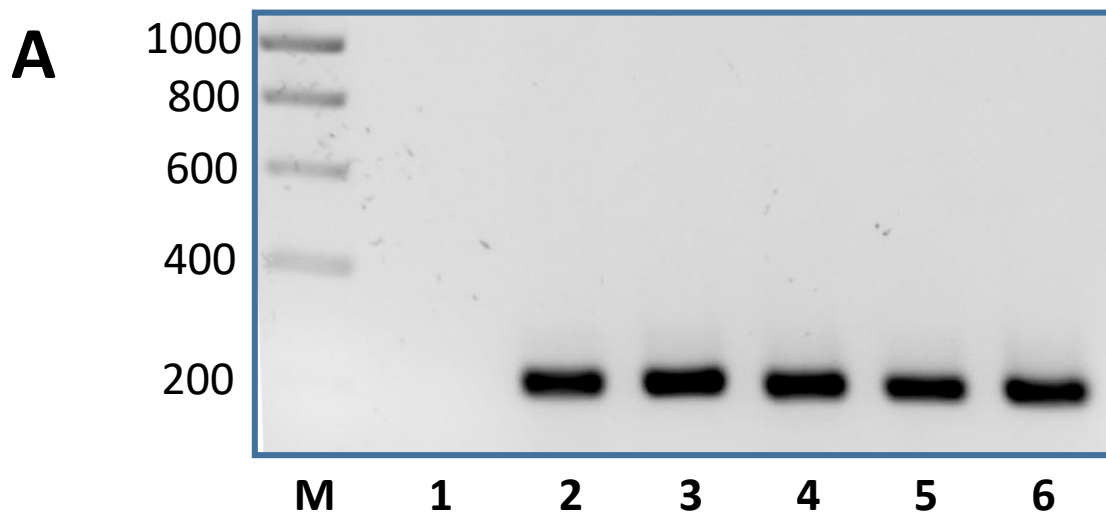

**B**

| patient number* | material age (years) | sample group | Primer-set 1 | Primer-set 3 |
|-----------------|----------------------|--------------|--------------|--------------|
| 2               | 15                   | 1            | +            | +            |
|                 |                      | 2            | -            | -            |
|                 |                      | 3            | -            | -            |
| 3               | 4                    | 1            | +            | +            |
|                 |                      | 2            | +            | +            |
|                 |                      | 3            | -            | -            |
| 8               | 4                    | 1            | +            | +            |
|                 |                      | 2            | +            | +            |
|                 |                      | 3            | +            | +            |
| 10              | 22                   | 1            | -            | -            |
|                 |                      | 2            | -            | -            |
|                 |                      | 3            | -            | -            |
| 11              | 6                    | 1            | -            | -            |
|                 |                      | 2            | -            | -            |
|                 |                      | 3            | -            | -            |

**Figure S5: Comparison of primer-set 1 and primer-set 3 in detecting *E. multilocularis* DNA in experimental and clinical samples.** A) Agarose gel showing the results of PCR amplification of primer-set 3 on isolated *E. multilocularis* cells mixed with 25 mg liver tissue of mongolian jirds. M, marker lane; 1, no *Echinococcus* cells; 2,  $10^2$  cells; 3,  $10^3$  cells; 4,  $10^4$  cells; 5,  $10^5$  cells; 6,  $10^6$  cells. Marker fragment sizes are indicated to the left (in bp). B) PCR results for selected FFPE samples. Indicated are the patient number (\*as listed in Table S1), the age of the material, the sample group, and the PCR results for primer-set 1 (PCR protocol A) and primer-set 3 (PCR protocol C). + indicates positive result, - indicates negative result.
